# Supplementary material for: Study of endothelial cell apoptosis using fluorescence resonance energy transfer (FRET) biosensor cell line with hemodynamic microfluidic chip system
Source: Royal Society of Chemistry journal article supplement (doi:10.1039/c3lc50105a), 2013-03-21
Supplement: c3lc50105a.pdf [file c3lc50105a.pdf]

## Electronic Supplementary Information

# Study of endothelial cell apoptosis using fluorescence resonance energy transfer (FRET) biosensor cell line with hemodynamic microfluidic chip system

J. Q. Yu<sup>a</sup>, L. K. Chin<sup>a</sup>, X. F. Liu<sup>b</sup>, A. Q. Liu<sup>a</sup> and K. Q. Luo<sup>\*b</sup>

<sup>a</sup>*School of Electrical and Electronic Engineering,  
Nanyang Technological University, Singapore 639798*

<sup>b</sup>*School of Chemical and Biomedical Engineering,  
Nanyang Technological University, Singapore 637457*

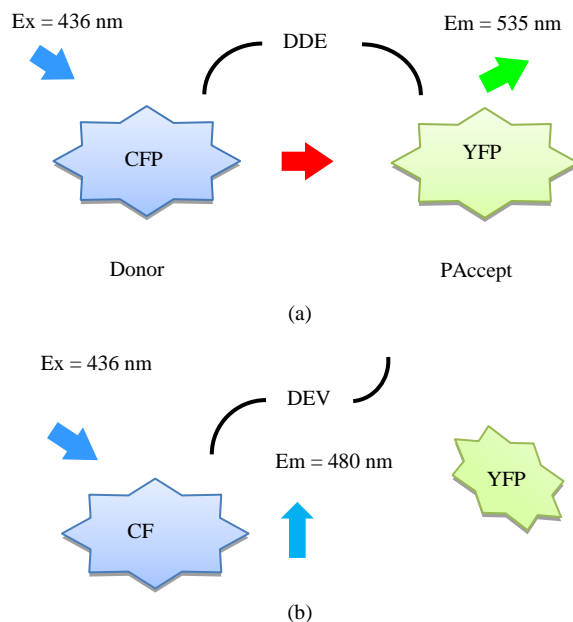

**Fig. S1** Principle of a living cell biosensor in detecting caspase-3 activation based on FRET effect. (a) Living HUVEC-C3 with a 535-nm green fluorescent emission, and (b) dead HUVEC-C3 with cleaved linker peptide and a 480-nm blue fluorescent emission.

(<sup>†</sup> Tel: +65 6790-4257; Fax: +65 6791-1761; Email: [kluo@ntu.edu.sg](mailto:kluo@ntu.edu.sg))

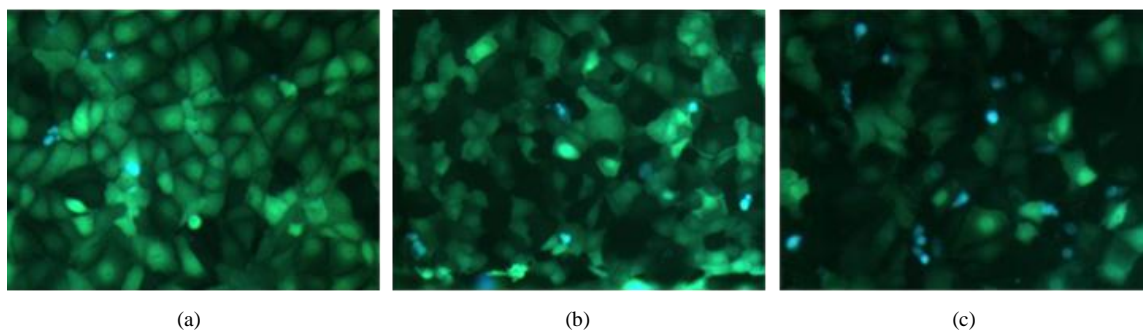

**Fig. S2** FRET changes in response to caspase-3 activation with different glucose concentrations (a) 5 mM (b) 10 mM (c) 20 mM under shear stress  $30 \text{ dyne cm}^{-2}$  2 h plus shear stress  $15 \text{ dyne cm}^{-2}$  10 h.

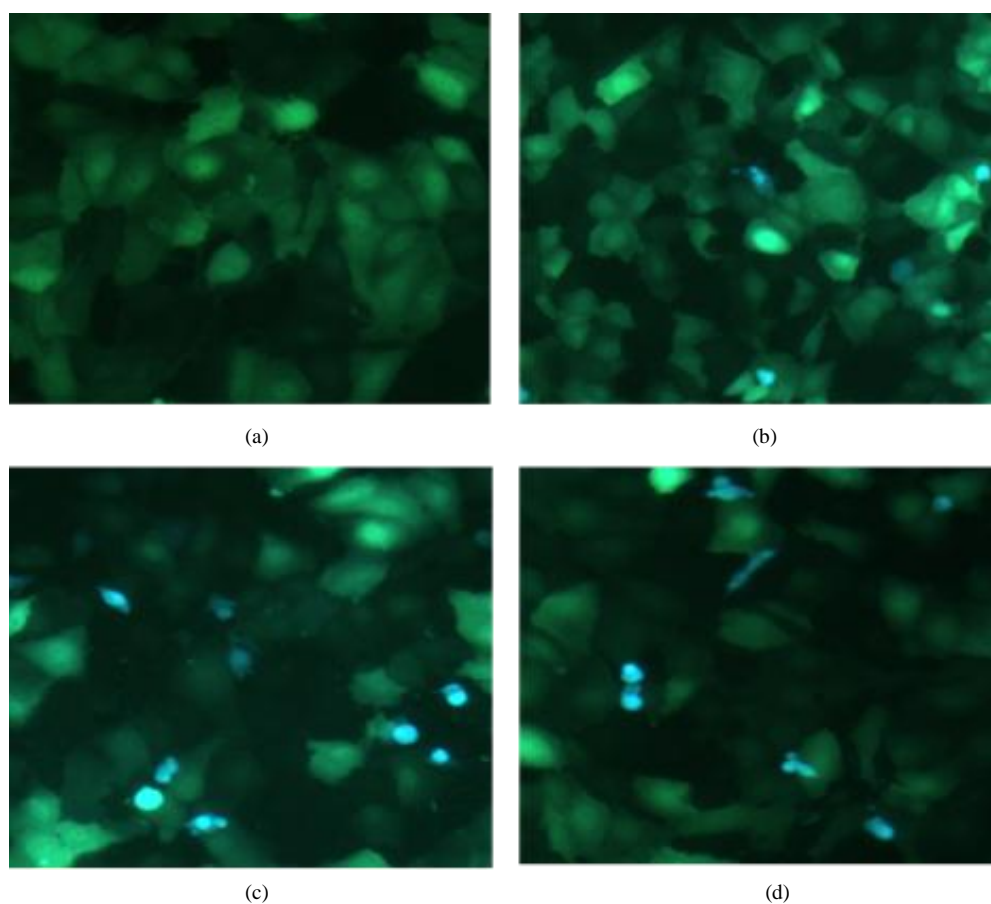

**Fig. S3** FRET changes in response to caspase-3 activation under different conditions (a) 5 mM glucose under shear stress of  $15 \text{ dyne cm}^{-2}$  for 12 h, (b) 20 mM glucose under shear stress of  $15 \text{ dyne cm}^{-2}$  for 12 h (c) 20 mM glucose under shear stress of  $30 \text{ dyne cm}^{-2}$  for 1 h plus shear stress of  $15 \text{ dyne cm}^{-2}$  for 11 h, (d) 20 mM glucose under shear stress of  $30 \text{ dyne cm}^{-2}$  for 2 h plus shear stress of  $15 \text{ dyne cm}^{-2}$  for 12 h.

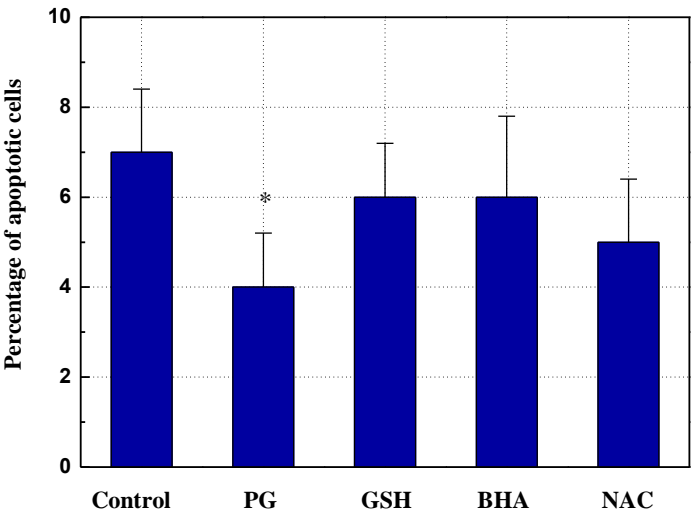

**Fig. S4** Effect of antioxidant drugs on high glucose and shear stress induced cell apoptosis.
